# Supplementary material for: Characterization of Beef Coming from Different European Countries through Stable Isotope (H, C, N, and S) Ratio Analysis
Source: MDPI journal article supplement (doi:10.3390/molecules28062856), 2023-03-22
Supplement: s1 [file s1]

Table S1: Inter-laboratory reproducibility for the beef muscle powder (NIST 8414) and the beef liver powder (NIST 1577b) Inter-Comparison Materials (SR = standard deviation of reproducibility).

|                                       | <b>LGL</b> | <b>FEM</b> | <b>EFS</b> | <b>CSL</b> | <b>IFR</b> | <b>ISO</b> | <b>ARC</b> | <b>Mean</b> | <b>SR</b> |
|---------------------------------------|------------|------------|------------|------------|------------|------------|------------|-------------|-----------|
| <b>NIST 8414</b>                      |            |            |            |            |            |            |            |             |           |
| $\delta(^{13}\text{C})$ (‰, vs V-PDB) | -25.2      | -25.4      | -25.5      | -25.3      | -25.2      | -25.3      | -25        | -25.3       | 0.2       |
| $\delta(^{15}\text{N})$ (‰, vs AIR)   | 6.8        | 6.8        | 6.6        | 6.7        | 6.5        | 6.4        | 6.8        | 6.7         | 0.2       |
| $\delta(^2\text{H})$ (‰, vs V-SMOW)   | -147       | -146       |            |            | -149       | -143       |            | -146        | 2.7       |
| $\delta(^{34}\text{S})$ (‰, vs CDT)   | 5.1        | 5.4        |            |            | 5.3        | 5.3        |            | 5.3         | 0.1       |
| <b>NIST 1577b</b>                     |            |            |            |            |            |            |            |             |           |
| $\delta(^{13}\text{C})$ (‰, vs V-PDB) | -21.5      | -21.6      | -21.8      | -21.4      | -21.4      | -21.5      |            | -21.5       | 0.2       |
| $\delta(^{15}\text{N})$ (‰, vs AIR)   | 7.6        | 7.8        | 7.4        | 7.5        | 7.5        | 7.3        |            | 7.5         | 0.2       |
| $\delta(^2\text{H})$ (‰, vs V-SMOW)   | -134       | -131       |            |            | -137       | -130       |            | -133        | 3.1       |
| $\delta(^{34}\text{S})$ (‰, vs CDT)   | 7.5        | 8.0        |            |            |            | 7.6        | 7.1        | 7.6         | 0.4       |

LGL - Bayerisches Landesamt für Gesundheit und Lebensmittelsicherheit, 85764 Oberschleissheim, Germany

FEM - Fondazione Edmund Mach, 38096 San Michele all'Adige, Trento, Italy

EFS - Eurofins Scientific Analytics, BP 42301, 44323 Nantes Cedex 3, France

CSL - The Food and Environment Research Agency, York YO41 1LZ, United Kingdom

IFR - Institute of Food Research, Colney, Norwich NR4 7 UA, United Kingdom

ISO - Isolab GmbH, 85301 Schweitenkirchen, Germany

ARC - AIT Austrian Institute of Technology GmbH, 2444 Seibersdorf, Austria
