# Supplementary material for: Characterization of Beef Coming from Different European Countries through Stable Isotope (H, C, N, and S) Ratio Analysis
Source: MDPI journal article supplement (doi:10.3390/molecules28062856), 2023-03-22
Supplement: s1 [file s1]

Table S2: Mean measured  $\delta(^2\text{H})$  for each sampling point and estimated  $\delta(^2\text{H})$  of water at beef sampling location according to the WaterIsotope database (<http://wateriso.utah.edu>). Coordinates were provided for all sampling points. In case of lack of information regarding the altitude of the sampling points, the coordinates were used as a reference on a topographic map.

|                                       | Measured<br>$\delta(^2\text{H})$ ‰ vs V-SMOW | WaterIsotope database<br>$\delta(^2\text{H})$ ‰ vs V-SMOW | Latitude<br>(DD) | Longitude<br>(DD) | Altitude<br>(m, a.s.l.) |
|---------------------------------------|----------------------------------------------|-----------------------------------------------------------|------------------|-------------------|-------------------------|
| Allgäu (Germany, DE)                  | -116.3                                       | -75.0                                                     | 47.6             | 10.3              | 1000                    |
| Mühlviertel (Austria, A)              | -110.3                                       | -63.0                                                     | 48.0             | 14.0              | 450                     |
| Frankonia (Germany, DE)               | -108.8                                       | -63.0                                                     | 49.9             | 11.1              | 500                     |
| Gäuboden (Germany, DE)                | -107.1                                       | -66.0                                                     | 49.0             | 12.6              | 500                     |
| Bohernagore (Republic of Ireland, IE) | -102.1                                       | -43.0                                                     | 52.4             | -8.3              | 200                     |
| Trento (Italy, IT)                    | -101.5                                       | -53.0                                                     | 46.1             | 11.1              | 200                     |
| Chalkidiki (Greece, GR)               | -99.0                                        | -44.0                                                     | 40.0             | 23.9              | 100                     |
| Limousine (France, FR)                | -98.9                                        | -52.0                                                     | 45.9             | 2.0               | 600                     |
| Barcelona (Spain, ES)                 | -97.0                                        | -33.0                                                     | 41.4             | 2.2               | 12                      |
| Orkneys (United Kingdom)              | -96.9                                        | -54.0                                                     | 59.0             | -3.1              | 20                      |
| Florence (Italy, IT)                  | -91.1                                        | -45.0                                                     | 43.9             | 11.4              | 450                     |
| Cornwall (United Kingdom)             | -90.0                                        | -40.0                                                     | 50.1             | -5.6              | 110                     |
| Sicily (Italy, IT)                    | -87.0                                        | -44.0                                                     | 37.8             | 14.6              | 800                     |
